# Supplementary material for: Cesarean Delivery and Risk of Infant Leukemia: A Report from the Children's Oncology Group
Source: Oxford University Press journal article supplement (doi:10.1158/1055-9965.epi-17-0778), 2018-01-22
Supplement: 10559965epi170778-sup-188383_2_supp_4394909_tzhd5x.docx [file 10559965epi170778-sup-188383_2_supp_4394909_tzhd5x.docx]

**Supplementary Table 1**. Association of Cesarean delivery and infant leukemia – Sensitivity analysis excluding infants diagnosed at < 3 months of age.

|  | Controls | Combined cases | | | ALL | | | AML | | |
| --- | --- | --- | --- | --- | --- | --- | --- | --- | --- | --- |
|  | **N** | **N** | **OR a** | **95% CI** | **N** | **OR a** | **95% CI** | **N** | **OR a** | **95% CI** |
| **Method of Delivery: Interview Data** |  |  |  |  |  |  |  |  |  |  |
| Cesarean | 72 | 103 | 1.38 | 0.95-2.00 | 69 | 1.63 | 1.08-2.46 | 34 | 1.09 | 0.66-1.81 |
| Pre-labor cesarean | 29 | 43 | 1.26 | 0.73-2.16 | 28 | 1.44 | 0.79-2.62 | 15 | 1.09 | 0.53-2.24 |
| Emergency cesarean | 25 | 35 | 1.68 | 0.95-2.98 | 25 | 2.01 | 1.08-3.75 | 10 | 1.13 | 0.50-2.55 |
| Vaginal | 251 | 242 | *Ref* |  | 148 | *Ref* |  | 94 | *Ref* |  |
| **Method of Delivery: Medical Record Data b** |  |  |  |  |  |  |  |  |  |  |
| Cesarean | 43 | 49 | 1.57 | 0.96-2.55 | 37 | 1.95 | 1.14-3.35 | 12 | 0.99 | 0.48-2.06 |
| Pre-labor cesarean | 19 | 21 | 1.46 | 0.73-2.92 | 17 | 2.04 | 0.97-4.31 | 4 | 0.59 | 0.18-1.98 |
| Emergency cesarean | 24 | 28 | 1.66 | 0.89-3.08 | 20 | 1.90 | 0.94-3.83 | 8 | 1.34 | 0.55-3.24 |
| Vaginal | 203 | 135 | *Ref* |  | 82 | *Ref* |  | 53 | *Ref* |  |

OR: Odds ratio; 95% CI: 95% confidence interval; ALL: acute lymphoblastic leukemia; AML: acute myeloid leukemia

a Adjusted for maternal race (white, black, Hispanic, and other), birth weight as a continuous variable, and the matching variable: year of birth

b Analyses based on interview data (top panel) include data from all ALL and AML cases and controls with information on mode of birth; analyses based on medical record data (bottom panel) include data from only Phase I ALL and AML cases and controls
